# Supplementary material for: Effect of a Multicomponent Food Pantry Intervention in Client Subgroups
Source: MDPI journal article supplement (doi:10.3390/nu16060805), 2024-03-12
Supplement: s1 [file s1]

**Table S1.** Pairwise comparisons of adjusted difference-in-differences in HEI-2015 by subgroups of race/ethnicity

|                                   | Hispanic/<br>Latinx | NH Black | NH Native<br>American/<br>Alaskan<br>Native | NH White | Additional<br>race or<br>missing <sup>1</sup> |
|-----------------------------------|---------------------|----------|---------------------------------------------|----------|-----------------------------------------------|
|                                   | versus              |          |                                             |          |                                               |
| Hispanic/Latinx                   | -                   | -2.5     | -4.6                                        | 4.6      | 7.5                                           |
| NH Black                          | 2.5                 | -        | -2.1                                        | 7.2      | 10.0                                          |
| NH Native American/Alaskan Native | 4.6                 | 2.1      | -                                           | 9.3      | 12.1                                          |
| NH White                          | -4.6                | -7.2     | -9.3                                        | -        | 2.9                                           |
| Additional Races <sup>1</sup>     | -7.5                | -10.0    | -12.1                                       | -2.9     | -                                             |

All pairwise comparisons have p-value>0.05.

<sup>1</sup> Comprised of groups with small sample sizes: multiracial, Asian, Native Hawaiian, write-in, and prefer not to answer
